# Supplementary material
Source: Springer Nature journal article supplement (https://www.springermedizin.de/resource/supplementary/12889_2013_6776_MOESM3_ESM.pdf/9499034)
Supplement: MOESM3 [file 9499034]

**Assessed for eligibility N = 1.341 and enrollment N = 395**

Company A - Assessed N = 116 enrolled N = 41  
Company B - Assessed N = 223 enrolled N = 107  
Company C - Assessed N = 469 enrolled N = 104  
Company D - Assessed N = 196 enrolled N = 53  
Company F - Assessed N = 195 enrolled N = 42  
Company E - Assessed N = 142 enrolled N = 48

**Enrollment**

Excluded (N = 6)

- Not meeting inclusion criteria (pregnancy) (N = 6)

Randomized N = 389

**Allocation**

Allocated to training group  
N = 194

Allocated to control group  
N = 195

**Follow-Up**

Lost to follow-up N = 41

- Left job N = 36
- dismissed N = 2
- Lack of motivation N = 3

Lost to follow-up N = 43

- Left job N = 37
- dismissed N = 2
- Lack of motivation N = 4

**Analysis**

Analysed N = 153

Completers with =>70 % adherence N = 102

Analysed N = 152
